# Supplementary material for: Genotype–Phenotype Association Analysis Reveals New Pathogenic Factors for Osteogenesis Imperfecta Disease
Source: PubMed Central journal article supplement (PMC6803541; doi:10.3389/fphar.2019.01200), 2019-10-15

## Supplementary Figure: Tissue expression distribution of 20 OI pathogenic genes and 15 predicted genes.

[20 OI pathogenic genes]:

### 1. COL1A1

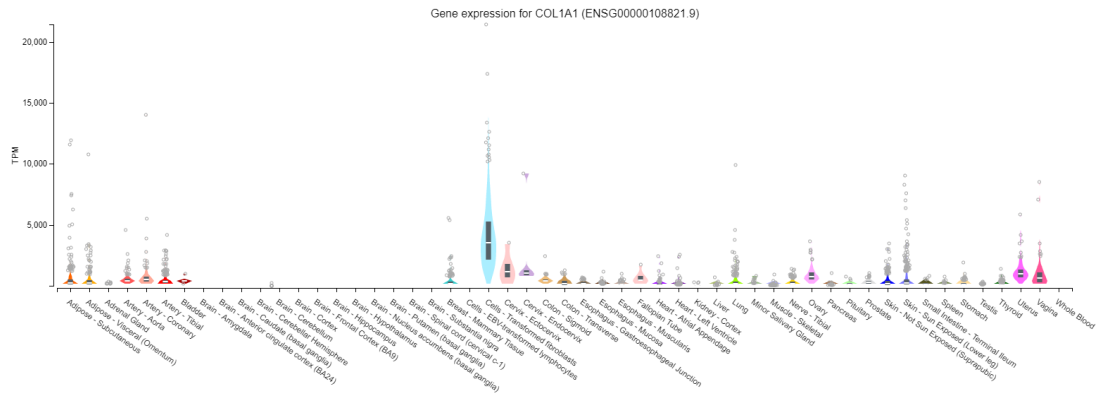

### 2. COL1A2

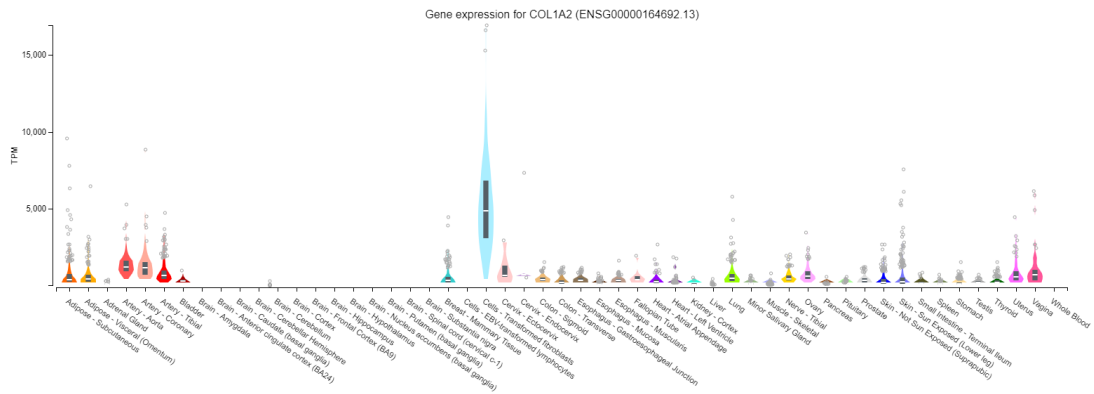

### 3. BMP1

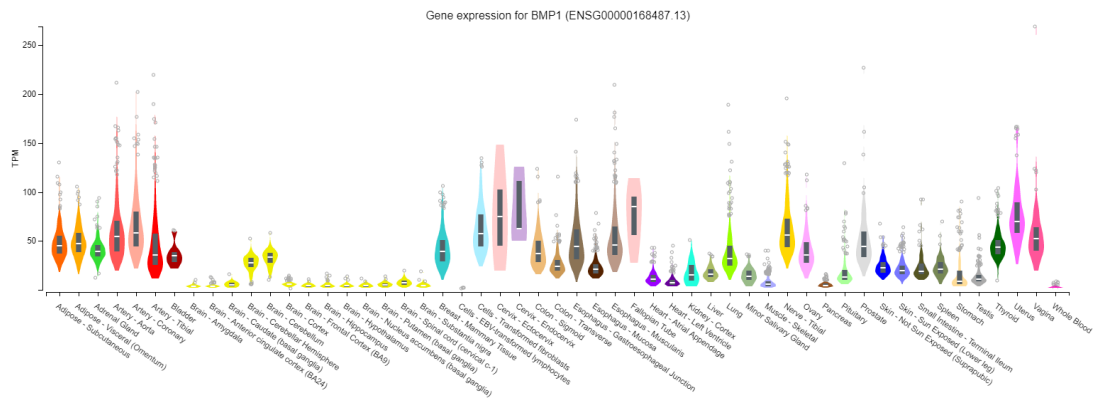









## 16. SPARC

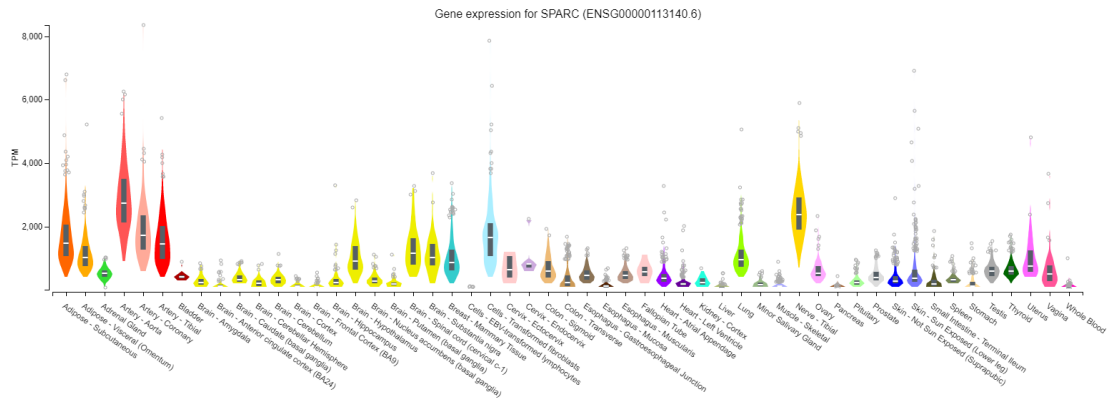

## 17. MBTPS2

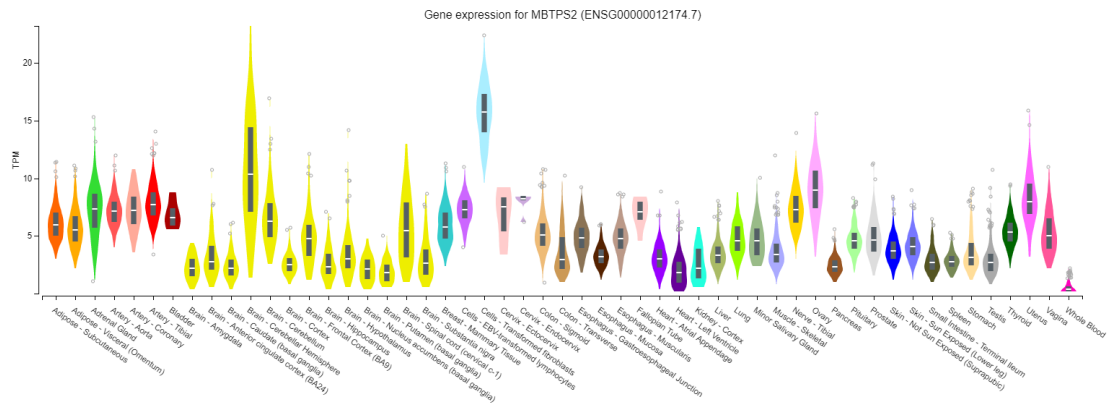

## 18. P4HB

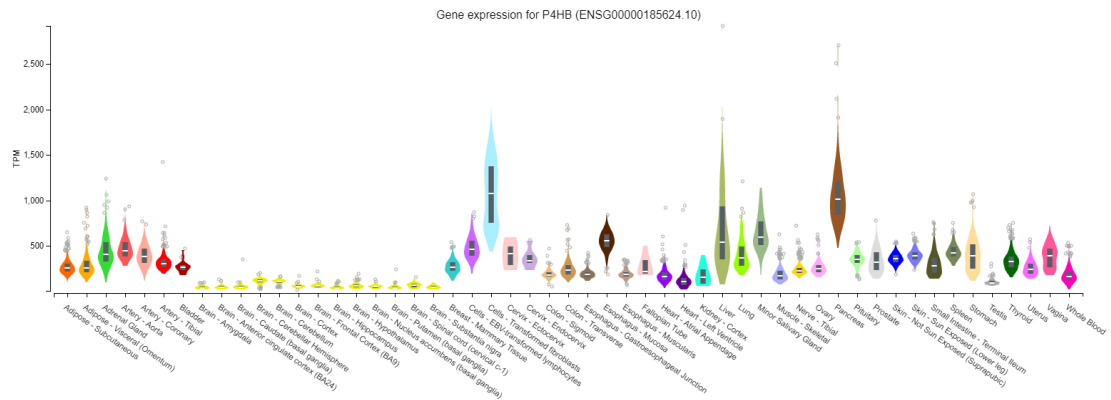

## 19. PLS3

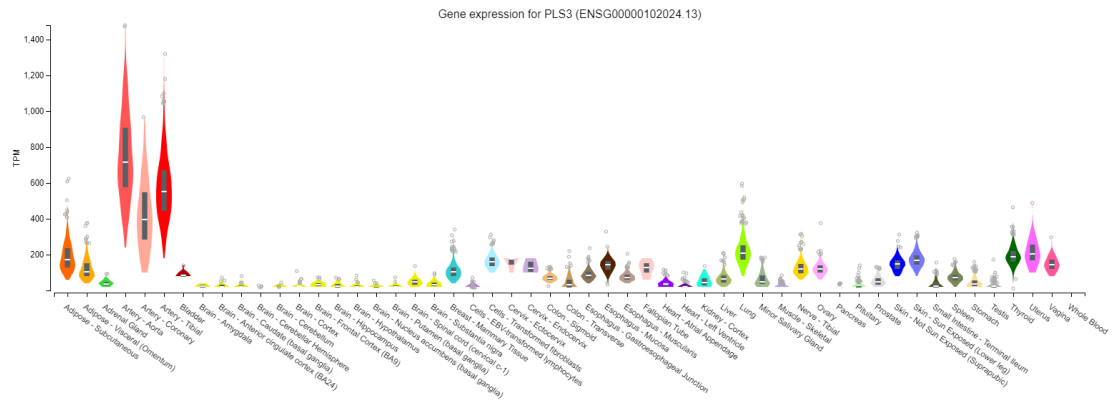

## 20. SEC24D

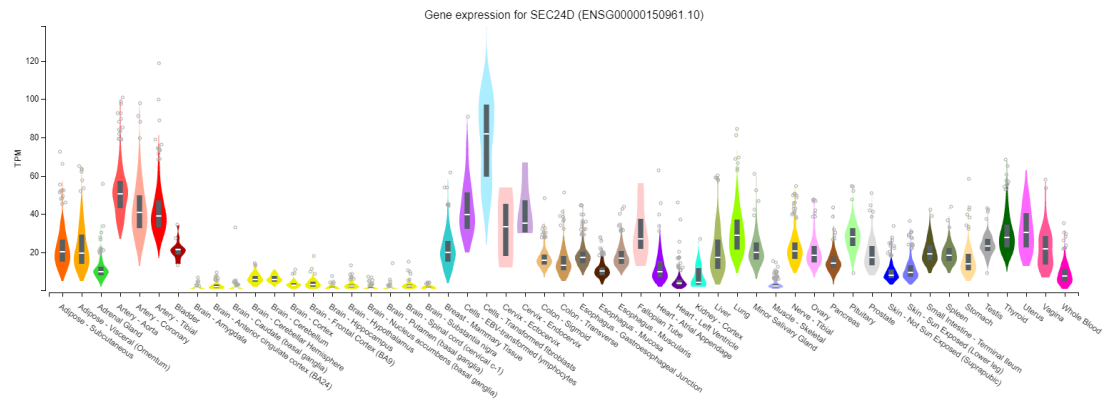









## 10. COL22A1

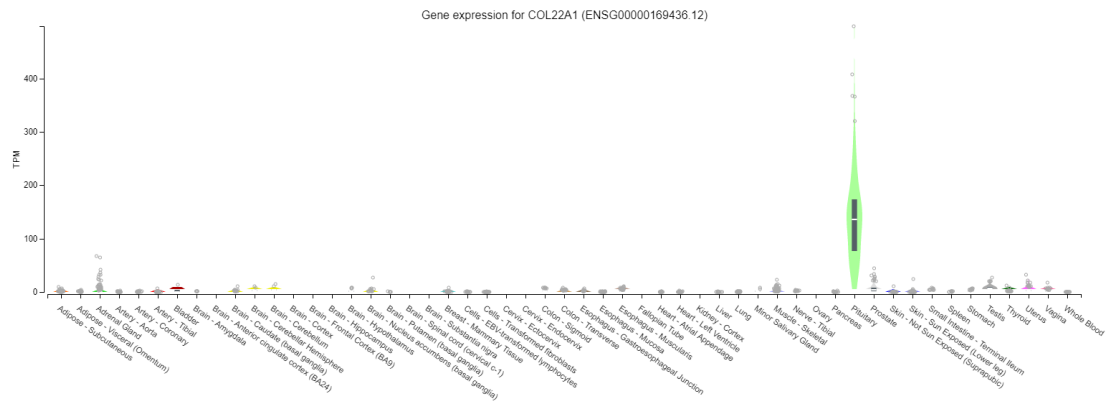

## 11. COL24A1

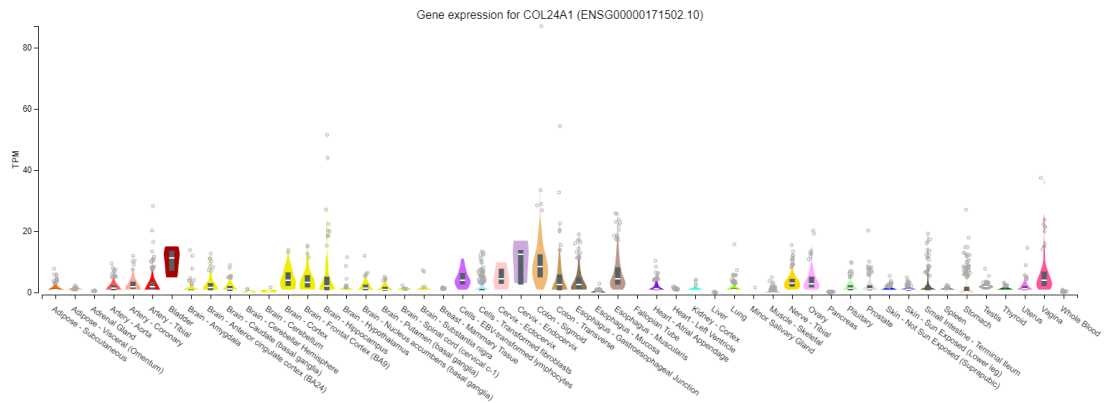

## 12. COL27A1

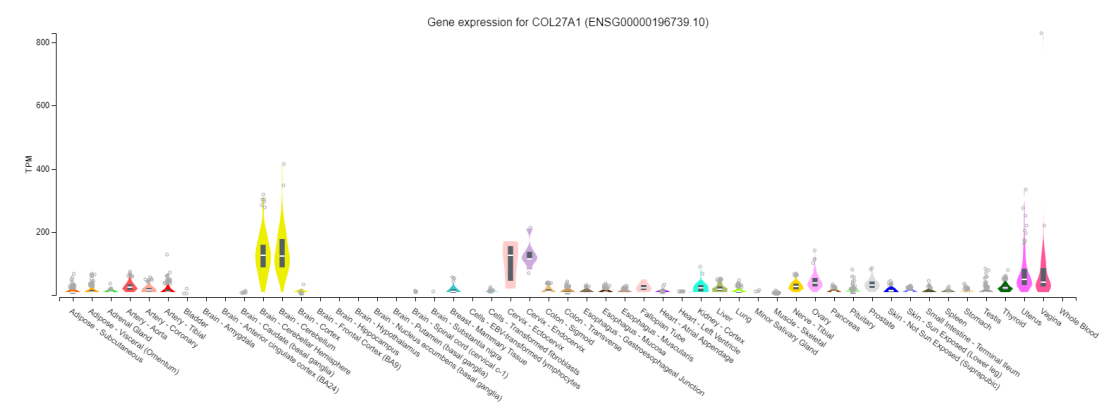

### 13. COL28A1

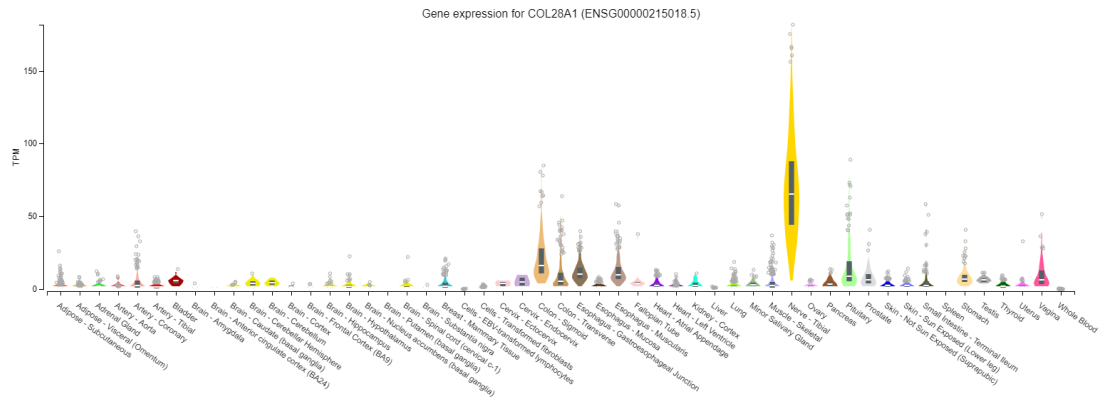

### 14. TLL1

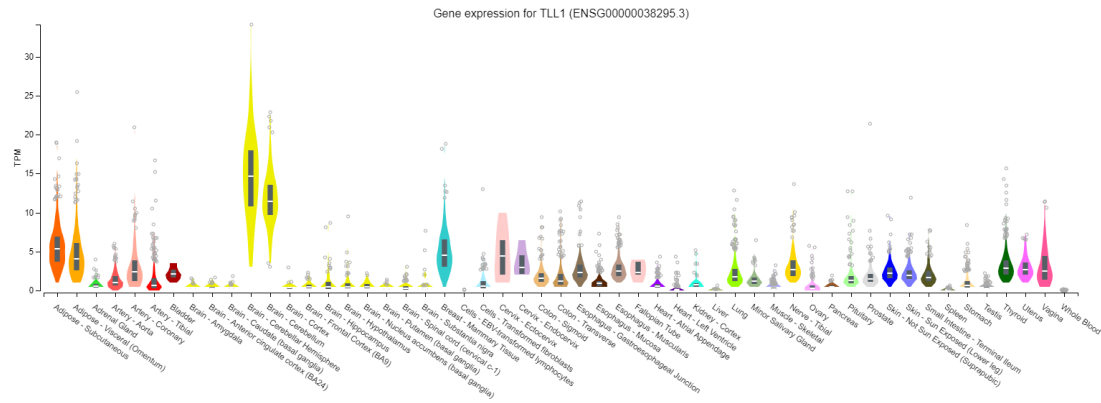

### 15. WNT8B

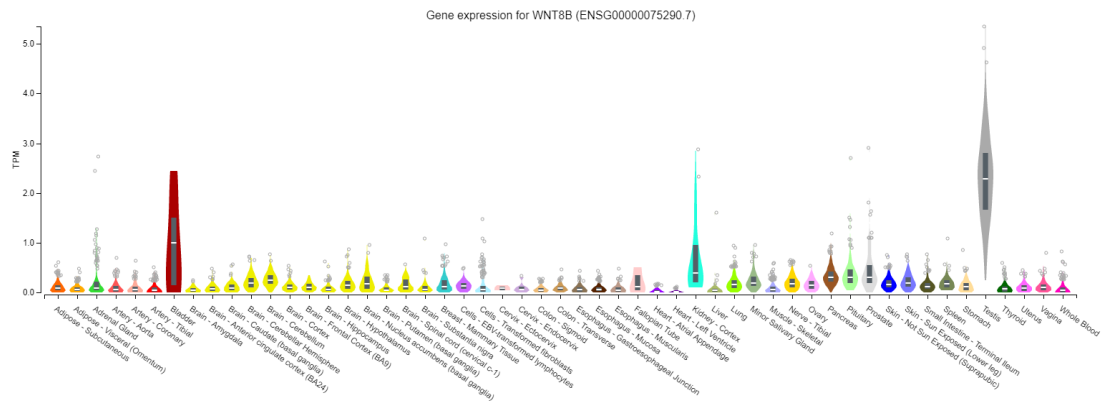

Supplement: DataSheet_1.pdf [file DataSheet_1.pdf]
