# Supplementary material for: Genotype–Phenotype Association Analysis Reveals New Pathogenic Factors for Osteogenesis Imperfecta Disease
Source: Front Pharmacol. 2019 Oct 15;10:1200. doi: 10.3389/fphar.2019.01200 (PMC6803541; doi:10.3389/fphar.2019.01200)
Supplement: Supplementary file 2 [file Table_1.xlsx]

## Sheet: Sheet1
Supplementary Table 1: Genetic information and standardized phenotypic description of 155 OI patients with mutations in COL1A1 and/or COL1A2
Gene	Chromosome	Mutation	cDNA	Mutation Type	Subtype	Age	Gender	Bone deformity	Hypermobile joints	Dense metaphyseal bands	Vertebral anomalies	vertebral fracture	Osteopenia	Dentinogenesis imperfecta	Blue sclerae	Hearing loss	Walking with assistance	Triangular face	popcorn calcif	PMID
COL1A1	17	p.Gly380Cys	c.1138G>T	Missense	*	11	f	1	0	1	0	0	*	1	1	0	*	*	0	29499418
COL1A1	17	p.Gly1058Ser	c.3172G>A	Missense	*	4	f	1	1	1	0	0	*	1	1	0	*	*	0	29499418
COL1A1	17	p.Gly1076Ser	c.3226G>A	Missense	*	2	f	1	0	*	0	0	*	1	1	0	*	*	*	29499418
COL1A1	17	p.Gly767Ser	c.2299G>A	Missense	*	10	f	1	1	1	1	1	*	1	0	0	*	*	0	29499418
COL1A1	17	p.Gly1040Ser	c.3118G>A	Missense	*	17.2	m	1	1	1	1	1	*	0	1	0	*	*	1	29499418
COL1A1	17	p.Gly821Ser	c.2461G>A	Missense	*	12	f	1	1	1	0	1	*	0	1	0	*	*	0	29499418
COL1A1	17	p.Gly362Ser	c.1084G>A	Missense	*	7	m	1	1	1	1	0	*	1	1	0	*	*	1	29499418
COL1A1	17	p.Gly203Val	c.608G>T	Missense	*	11	f	1	1	1	0	0	*	0	1	0	*	*	0	29499418
COL1A1	17	p.Gly857Cys	c.2569G>T	Missense	*	10	m	1	1	1	1	1	*	1	1	0	*	*	0	29499418
COL1A1	17	p.Arg1026Ter	c.3076C>T	Nonsense	*	5	f	1	1	0	0	0	*	0	1	0	*	*	0	29499418
COL1A1	17		c.2128-14T>A	*	*	5.8	f	1	1	1	0	0	*	0	1	0	*	*	0	29499418
COL1A1	17	p.Ala1060fs	c.3178del	*	*	1.6	m	1	1	0	0	0	*	0	1	0	*	*	0	29499418
COL1A1	17	p.Glu85*	c.253G>T	*	*	10.8	m	1	1	1	0	0	*	0	1	0	*	*	0	29499418
COL1A1	17	p.Gly1151Trpfs*23	c.3450_3451insT	*	*	7.6	f	1	1	0	0	0	*	0	1	0	*	*	0	29499418
COL1A1	17	p.Pro403Leufs*138	c.1208delC	*	*	4	m	1	1	0	0	0	*	0	1	0	*	*	0	29499418
COL1A1	17	p.Leu1389Pro	c.4166T>C	*	*	Fetus	m	1	0	0	0	0	*	*	*	*	*	*	0	29499418
COL1A2	7	p.Gly349Cys	c.1045G>T	Missense	*	8	m	1	1	1	0	0	*	1	1	0	*	*	0	29499418
COL1A2	7	p.Gly292Asp	c.875G>A	*	*	12	f	1	1	1	0	0	*	1	1	0	*	*	0	29499418
COL1A2	7	p.Gly772Ser	c.2314G>A	Missense	*	12	m	1	1	0	0	0	*	0	1	0	*	*	0	29499418
COL1A2	7	p.Gly193Cys	c.577G>T	*	*	5	m	1	1	0	0	0	*	0	1	0	*	*	0	29499418
COL1A2	7	p.Gly1102Val	c.3305G>T	Missense	*	6	m	1	1	0	0	0	*	1	1	0	*	*	0	29499418
COL1A2	7	p.Gly997Ser	c.2989G>A	*	*	0.1	m	1	0	1	0	0	*	0	1	0	*	*	0	29499418
COL1A2	7		c.2565 + 1G>A	Splicing	*	6.5	m	1	1	1	0	0	*	1	1	0	*	*	0	29499418
COL1A2	7	p.Arg926His	c.2777G>A	Missense	*	1.6	m	1	1	0	0	0	*	0	1	0	*	*	0	29499418
COL1A1	17		c.1875+1G>A	Splicing	*	7	F	1	*	*	1	*	1	0	1	0	*	*	*	18755172
COL1A1	17		c.1875+1G>A	Splicing	*	31	m	1	*	*	1	*	1	0	1	0	*	*	*	18755172
COL1A1	17	p.Gly371Ser	c.1111G>A+c.671G> A	Missense	III	29	M	1	*	*	1	*	1	1	W	*	0	1	1	26604951
COL1A2	7	p.Gly112Asp	c.335G>A	Missense	I	35	M	0	*	*	0	*	*	1	1	0	0	1	*	26627451
COL1A2	7	p.Gly112Asp	c.335G>A	Missense	I	37	F	1	*	*	1	*	*	0	1	0	0	0	*	26627451
COL1A2	7	p.Gly460Ser	c.1378G>A	Missense	IV	10	F	1	*	*	1	*	*	1	1	0	0	0	*	26627451
COL1A2	7	p.Gly556Cys	c.1666G>T	Missense	IV	8	M	1	*	*	0	*	*	1	1	0	0	0	*	26627451
COL1A2	7	p.Gly673Asp	c.2018G>A	Missense	IV	26	M	1	*	*	1	*	*	1	0	0	1	0	*	26627451
COL1A2	7	p.Gly733Cys	c.2197G>T	Missense	I	4	M	0	*	*	0	*	*	0	1	0	0	0	*	26627451
COL1A2	7	p.Gly733Cys	c.2197G>T	Missense	I	31	F	0	*	*	0	*	*	0	1	0	0	0	*	26627451
COL1A2	7	p.Gly733Cys	c.2197G>T	Missense	I	35	F	0	*	*	0	*	*	0	0	0	0	0	*	26627451
COL1A2	7	p.Gly733Cys	c.2197G>T	Missense	I	42	M	1	*	*	0	*	*	0	0	0	0	0	*	26627451
COL1A2	7	p.Gly760Glu	c.2279G>A	Missense	IV	10	F	1	*	*	1	*	*	1	1	1	0	0	*	26627451
COL1A2	7	p.Gly760Glu	c.2279G>A	Missense	IV	12	F	1	*	*	1	*	*	1	1	0	0	0	*	26627451
COL1A2	7	p.Gly760Glu	c.2279G>A	Missense	IV	12	F	1	*	*	1	*	*	1	1	0	1	0	*	26627451
COL1A2	7	p.Gly760Glu	c.2279G>A	Missense	IV	16	M	1	*	*	1	*	*	1	0	0	0	0	*	26627451
COL1A2	7	p.Gly760Glu	c.2279G>A	Missense	IV	32	M	1	*	*	1	*	*	1	1	0	0	0	*	26627451
COL1A2	7	p.Gly760Glu	c.2279G>A	Missense	IV	48	F	1	*	*	1	*	*	1	1	0	0	0	*	26627451
COL1A2	7	p.Gly760Glu	c.2279G>A	Missense	IV	53	F	0	*	*	0	*	*	1	1	1	0	0	*	26627451
COL1A2	7	p.Gly760Glu	c.2279G>A	Missense	IV	62	F	1	*	*	1	*	*	1	1	1	0	1	*	26627451
COL1A2	7	p.Gly763Asp	c.2288G>A	Missense	III	14	F	1	*	*	1	*	*	1	1	0	1	0	*	26627451
COL1A2	7	p.Gly844Asp	c.2531G>A	Missense	I	0.4	F	0	*	*	0	*	*	0	1	1	*	0	*	26627451
COL1A2	7	p.Gly844Asp	c.2531G>A	Missense	I	28	F	1	*	*	0	*	*	0	1	0	0	0	*	26627451
COL1A2	7	p.Cys1272Ser	c.3815G>C	Missense	IV	30	F	1	*	*	0	*	*	0	0	0	0	0	*	26627451
COL1A1	17		c.333-9A>G	Splicing	I	14	F	0	*	*	0	*	*	0	1	0	0	1	*	26627451
COL1A1	17		c.441delC	Frameshift	I	5.5	F	0	*	*	0	*	*	0	1	0	0	0	*	26627451
COL1A1	17		c.386_387insC	Frameshift	I	18	M	0	*	*	0	*	*	0	1	0	0	0	*	26627451
COL1A1	17		c.386_387insC	Frameshift	I	19	M	0	*	*	0	*	*	0	1	0	0	1	*	26627451
COL1A1	17		c.386_387insC	Frameshift	I	53	M	1	*	*	0	*	*	0	1	1	0	0	*	26627451
COL1A1	17	p.Arg131X	c.391C>T	Nonsense	IV	58	F	1	*	*	1	*	*	1	1	1	0	1	*	26627451
COL1A1	17		c.477_478insT	Frameshift	IV	17	M	1	*	*	0	*	*	0	1	0	0	0	*	26627451
COL1A1	17	p.Pro193Profs*72	c.579delT	Frameshift	I	2.1	F	1	*	*	0	*	*	1	1	0	0	0	*	26627451
COL1A1	17	p.Pro193Profs*72	c.579delT	Frameshift	I	3.8	F	1	*	*	0	*	*	1	1	0	0	0	*	26627451
COL1A1	17	p.Pro193Profs*72	c.579delT	Frameshift	I	16	F	1	*	*	1	*	*	1	1	0	0	0	*	26627451
COL1A1	17	p.Pro193Profs*72	c.579delT	Frameshift	I	22	M	0	*	*	0	*	*	0	1	0	0	0	*	26627451
COL1A1	17	p.Pro193Profs*72	c.579delT	Frameshift	I	29	F	0	*	*	0	*	*	1	1	0	0	1	*	26627451
COL1A1	17	p.Pro193Profs*72	c.579delT	Frameshift	I	30	M	1	*	*	0	*	*	1	1	1	0	0	*	26627451
COL1A1	17	p.Pro193Profs*72	c.579delT	Frameshift	I	32	F	1	*	*	0	*	*	1	1	1	0	0	*	26627451
COL1A1	17	p.Pro193Profs*72	c.579delT	Frameshift	I	53	F	1	*	*	1	*	*	1	1	1	0	0	*	26627451
COL1A1	17	p.Pro193Profs*72	c.579delT	Frameshift	I	54	F	1	*	*	0	*	*	1	1	1	0	0	*	26627451
COL1A1	17		c.642+1G	Splicing	IV	3	F	0	*	*	0	*	*	0	1	0	0	0	*	26627451
COL1A1	17	p.Gly197Asp	c.590G>A	Missense	I	7.4	F	1	*	*	1	*	*	0	1	0	1	0	*	26627451
COL1A1	17	p.Arg220X	c.658C>T	Nonsense	I	2	F	0	*	*	0	*	*	0	1	0	0	0	*	26627451
COL1A1	17	p.Arg220X	c.658C>T	Nonsense	I	3.2	M	0	*	*	0	*	*	0	1	0	0	0	*	26627451
COL1A1	17	p.Arg220X	c.658C>T	Nonsense	I	4	F	0	*	*	0	*	*	0	1	0	0	0	*	26627451
COL1A1	17	p.Arg220X	c.658C>T	Nonsense	I	29	F	0	*	*	0	*	*	0	1	1	0	0	*	26627451
COL1A1	17	p.Arg220X	c.658C>T	Nonsense	I	33	F	1	*	*	0	*	*	0	1	0	0	0	*	26627451
COL1A1	17	p.Arg220X	c.658C>T	Nonsense	I	38	M	0	*	*	0	*	*	0	1	1	0	0	*	26627451
COL1A1	17	p.Gly257Arg	c.769G>A	Missense	IV	12	F	0	*	*	0	*	*	0	1	0	0	1	*	26627451
COL1A1	17	p.Gly257Arg	c.769G>A	Missense	IV	13	M	0	*	*	0	*	*	0	1	0	0	1	*	26627451
COL1A1	17	p.Gly257Arg	c.769G>A	Missense	IV	41	M	1	*	*	0	*	*	0	1	1	0	1	*	26627451
COL1A1	17		c.858+24G>A	Splicing	IV	44	F	1	*	*	1	*	*	0	0	0	0	0	*	26627451
COL1A1	17	p.Gly293Asp	c.878G>A	Missense	III	19	F	1	*	*	1	*	*	1	1	0	1	0	*	26627451
COL1A1	17	p.Gly341Arg	c.1021G>C	Missense	III	0.2	M	1	*	*	0	*	*	1	1	0	*	0	*	26627451
COL1A1	17	c.1155+3_6delAAGT	c.1155+3_1155+6del	Splicing	IV	1.6	F	1	*	*	0	*	*	0	1	0	0	0	*	26627451
COL1A1	17		c.1354-12G>A	Splicing	I	10	F	0	*	*	1	*	*	0	1	0	0	0	*	26627451
COL1A1	17		c.1354-12G>A	Splicing	I	12	M	0	*	*	0	*	*	0	1	0	0	0	*	26627451
COL1A1	17		c.1354-12G>A	Splicing	I	44	M	0	*	*	0	*	*	0	1	0	0	0	*	26627451
COL1A1	17		c.1380delT	Frameshift	I	7	M	0	*	*	0	*	*	0	1	0	0	0	*	26627451
COL1A1	17		c.1380delT	Frameshift	I	16	F	1	*	*	1	*	*	0	1	0	0	0	*	26627451
COL1A1	17		c.1380delT	Frameshift	I	28	F	0	*	*	1	*	*	0	0	0	0	0	*	26627451
COL1A1	17		c.1667delC	Frameshift	IV	5.2	M	1	*	*	0	*	*	0	1	0	0	0	*	26627451
COL1A1	17		c.1615-1G>T	Splicing	I	11	M	1	*	*	0	*	*	1	1	0	0	1	*	26627451
COL1A1	17		c.2384-2394del11mers	Frameshift	IV	17	F	1	*	*	1	*	*	0	1	0	0	0	*	26627451
COL1A1	17	p.Gly821Ser	c.2461G>A	Missense	IV	21	M	0	*	*	1	*	*	1	0	0	1	1	*	26627451
COL1A1	17		c.2523delT	Frameshift	I	46	F	1	*	*	1	*	*	0	1	0	0	0	*	26627451
COL1A1	17	p.Arg882X	c.2644C>T	Nonsense	I	14	M	0	*	*	0	*	*	1	1	0	0	0	*	26627451
COL1A1	17	p.Arg882X	c.2644C>T	Nonsense	I	32	F	1	*	*	1	*	*	1	1	0	0	1	*	26627451
COL1A1	17		c.2775delT	Frameshift	I	31	F	0	*	*	0	*	*	1	1	0	0	0	*	26627451
COL1A1	17	p.Gly1022Ser	c.3064G>A	Missense	III	0.2	F	1	*	*	1	*	*	1	1	0	*	0	*	26627451
COL1A1	17	p.Arg1026X	c.3076C>T	Nonsense	I	4.8	F	0	*	*	0	*	*	0	1	0	0	0	*	26627451
COL1A1	17	p.Arg1026X	c.3076C>T	Nonsense	I	35	F	0	*	*	0	*	*	0	1	1	0	0	*	26627451
COL1A1	17		c.3124_3134del11	Frameshift	IV	2.8	M	1	*	*	0	*	*	0	1	0	0	1	*	26627451
COL1A1	17	p.Gly1169Ser	c.3505G>A	Missense	IV	0.7	M	1	*	*	0	*	*	1	1	0	*	0	*	26627451
COL1A1	17		c.4308_4309insA	Frameshift	III	1.2	F	1	*	*	1	*	*	0	1	0	0	0	*	26627451
COL1A1	17	p.Gly203Val	c.608G>T	Missense	III	Fetus	M	*	*	*	*	*	*	0	0	0	*	*	*	16879195
COL1A1	17	p.Gly257Arg	c.769G>A	Missense	IV	35	M	*	*	*	*	*	*	0	1	1	1	*	*	16879195
COL1A1	17	p.Gly683Ser	c.2047G>T	Missense	IV	5	F	*	*	*	*	*	*	0	1	0	*	*	*	16879195
COL1A1	17	p.Gly821Ser	c.2461G>A	Missense	III	40	F	*	*	*	1	*	*	0	1	1	1	1	*	16879195
COL1A1	17	p.Arg253*	c.757C>T	Nonsense	I	13	M	1	*	*	*	*	*	0	0	0	*	*	*	16879195
COL1A1	17	p.Arg1141*	c.3421C>T	Nonsense	I	22	F	*	*	*	1	*	*	0	1	0	*	*	*	16879195
COL1A1	17	p.Gly194Valfs*71	c.579delT	Frameshift	I	15	M	1	*	*	*	*	*	0	1	0	*	*	*	16879195
COL1A1	17	*	IVS12‐2A>C	*	III	34	M	1	*	*	*	*	*	0	1	1	1	*	*	16879195
COL1A1	17	*	IVS17+1G>A	*	I	5	M	1	1	*	1	*	*	0	1	1	*	*	*	16879195
COL1A1	17	*	IVS21+1G>C	*	I	4	M	0	*	*	*	*	*	0	1	0	*	*	*	16879195
COL1A1	17	p.Gly463 fsX476	c.1919_20insC	*	I	5	M	*	*	*	*	*	*	0	1	0	*	*	*	16879195
COL1A1	17	*	IVS29‐5C>A	*	I	6	M	1	1	*	*	*	*	0	1	1	*	1	*	16879195
COL1A1	17	*	IVS39+1G>A	*	I	33	F	0	*	*	*	*	*	1	1	1	*	*	*	16879195
COL1A1	17	p.Glu1068Argfs*40	c.3201delT	*	I	3	F	0	*	*	*	*	*	0	1	0	*	*	*	16879195
COL1A2	7	p.Gly193Asp	c.578G>A	Missense	IV	6	F	*	*	*	*	*	*	0	0	0	*	*	*	16879195
COL1A2	7	p.Gly625Asp	c.1874G>A	Missense	Ⅱ	Fetus	M	1	*	*	*	*	*	0	0	0	*	*	*	16879195
COL1A2	7	p.Gly754Cys	c.2260G>T	Missense	IV	1.5	M	*	*	*	*	*	*	1	1	0	*	*	*	16879195
COL1A2	7	p.Gly835	c.2503G>T	Missense	III	3	M	1	*	*	1	*	*	1	1	0	1	*	*	16879195
COL1A2	7	p.Gly991Val	c.2972G>T	Missense	III	1	F	1	*	*	1	*	*	0	1	0	*	*	*	16879195
COL1A2	7	p.*1367Glnext*5	c.4099T>C	Stop codon mutated	IV	30	F	*	*	*	*	*	1	0	0	0	*	*	*	16879195
COL1A1	17	p.Asp1065Glu	c.3195T>G	Missense	*	80	m	*	*	*	*	1	*	*	0	*	*	*	*	29946973
COL1A1	17	p.Asp1065Glu	c.3195T>G	Missense	*	51	f	*	*	*	*	0	*	*	1	*	*	*	*	29946973
COL1A1	17	p.Asp1065Glu	c.3195T>G	Missense	*	40	m	*	*	*	*	0	*	*	0	*	*	*	*	29946973
COL1A1	17	p.Pro951fs	c.2850dupG	Frameshift	*	71	f	*	*	*	*	0	*	*	1	*	*	*	*	29946973
COL1A1	17	p.Pro951fs	c.2850dupG	Frameshift	*	23	m	*	*	*	*	0	*	*	0	*	*	*	*	29946973
COL1A1	17	p.Pro951fs	c.2850dupG	Frameshift	*	50	f	*	*	*	*	0	*	*	0	*	*	*	*	29946973
COL1A1	17	c.1054_1056del+2del	c.1054_1056del+2del	Splicing	*	42	f	*	*	*	*	1	*	*	0	*	*	*	*	29946973
COL1A1	17	p.Gln199fs	c.595delC	Frameshift	*	74	f	*	*	*	*	1	*	*	1	*	*	*	*	29946973
COL1A1	17	p.Asn1254fs	c.3758dupA	Frameshift	*	41	m	*	*	*	*	0	*	*	0	*	*	*	*	29946973
COL1A1	17	p.Gly1178fs	*	*	*	51	m	*	*	*	*	0	*	*	0	*	*	*	*	29946973
COL1A1	17	p.Gly233Arg	c.697G>C	Missense	*	68	f	*	*	*	*	1	*	*	0	*	*	*	*	29946973
COL1A1	17	p.Pro871fs	c.2612delC	Frameshift	*	46	f	*	*	*	*	0	*	*	0	*	*	*	*	29946973
COL1A1	17	p.Pro871fs	c.2612delC	Frameshift	*	35	f	*	*	*	*	0	*	*	1	*	*	*	*	29946973
COL1A1	17	p.Gly194Valfs	c.579delT	Frameshift	*	19	m	*	*	*	*	0	*	*	0	*	*	*	*	29946973
COL1A1	17	c.1614+1G>A	c.1614+1G>A	Splicing	*	29	f	*	*	*	*	1	*	*	0	*	*	*	*	29946973
COL1A1	17	p.Lys538Argfs	c.1613delA	Frameshift	*	57	f	*	*	*	*	1	*	*	0	*	*	*	*	29946973
COL1A1	17	c.2830-1G>A	c.2830-1G>A	Splicing	*	61	m	*	*	*	*	0	*	*	0	*	*	*	*	29946973
COL1A1	17	p.Tyr1216Thrfs	c.3646delT	Splicing	*	31	m	*	*	*	*	0	*	*	1	*	*	*	*	29946973
COL1A1	17	p.Tyr1216Thrfs	c.3646delT	Splicing	*	61	f	*	*	*	*	1	*	*	0	*	*	*	*	29946973
COL1A1	17	p.Pro205Ala	c.613C>G	Missense	*	41	m	*	*	*	*	1	*	*	0	*	*	*	*	29946973
COL1A1	17	p.Gly692Valfs*74	c.2073delT	Frameshift	*	33	m	*	*	*	*	1	*	*	0	*	*	*	*	29946973
COL1A2	7	p.Gly193Ser	c.577G>A	Missense	*	28	m	*	*	*	*	0	*	*	0	*	*	*	*	29946973
COL1A2	7	p.Gly292Ser	c.874G>A	Missense	*	31	f	*	*	*	*	6	*	*	0	*	*	*	*	29946973
COL1A2	7	p.Gly292Ser	c.874G>A	Missense	*	58	f	*	*	*	*	0	*	*	0	*	*	*	*	29946973
COL1A2	7	p.Gly772Ser	c.2314G>A	Missense	*	52	f	*	*	*	*	0	*	*	0	*	*	*	*	29946973
COL1A2	7	p.Lys1288Argfs	c.3859delA	Frameshift	*	37	m	*	*	*	*	1	*	*	1	*	*	*	*	29946973
COL1A2	7	p.Gly292Ser	c.874G>A	Missense	*	49	m	*	*	*	*	1	*	*	0	*	*	*	*	29946973
COL1A2	7	p.Gly724Glu	c.2171G>A	Missense	*	59	f	*	*	*	*	1	*	*	0	*	*	*	*	29946973
COL1A2	7	p.Gly1105Ser	c.3313G>A	Missense	*	49	m	*	*	*	*	0	*	*	0	*	*	*	*	29946973
COL1A1	17	p.Tyr47X	c.141C>A	Nonsense	I	23	F	0	1	*	*	*	*	1	0	0	*	*	*	27132807
COL1A1	17	p.Cys61Phe	c.182G>T	Missense	III	45	M	1	*	*	*	*	*	*	0	0	1	*	*	27132807
COL1A1	17	p.Arg131X	c.391C>T	Nonsense	I	24	F	1	*	*	*	*	*	1	0	0	*	*	*	27132807
COL1A1	17	p.Arg415X	c.1243C>T	Nonsense	I	22	M	1	*	*	1	*	*	1	1	0	*	*	*	27132807
COL1A1	17	p.Gln1341X	c.4021C>T	Nonsense	I	18	M	1	*	*	*	1	*	1	1	0	*	*	*	27132807
COL1A1	17	splice-site mutation	c.1057-1G>T	Splicing	IV	50	M	1	*	*	*	*	*	1	1	1	*	*	*	27132807
COL1A1	17	p.Gly794Gly	c.2382T>C	Silent	IV	24	F	1	1	*	*	*	*	1	*	0	*	*	*	27132807
